# Supplementary material for: Accurate Microbiome Sequencing with Synthetic Long Read Sequencing
Source: bioRxiv or medRxiv preprint supplement (doi:10.1101/2020.10.02.324038), 2020-10-02
Supplement: Supplementary file [file media-1.pdf]

Supplementary information for “**Accurate Microbiome Sequencing with Synthetic Long Read Sequencing**”

Nico Chung<sup>1</sup>, Marc W. Van Goethem<sup>2</sup>, Melanie A. Preston<sup>3</sup>, Filip Lhota<sup>4</sup>, Leona Cerna<sup>4</sup>, Ferran Garcia-Pichel<sup>5</sup>, Vanessa Fernandes<sup>5</sup>, Ana Giraldo-Silva<sup>5</sup>, Hee Shin Kim<sup>6</sup>, Evan Hurowitz<sup>6</sup>, Michael Balamotis<sup>6</sup>, Indira Wu<sup>6</sup>, Tuval Ben-Yehezkel<sup>6\*</sup>

<sup>1</sup> Welgene Biotech, Taipei, Taiwan

<sup>2</sup> Lawrence Berkeley National Laboratory, Berkeley, CA, USA

<sup>3</sup> Promega Corporation, Madison, WI, USA

<sup>4</sup> Gennet, Centre for Medical Genetics and Reproductive Medicine, Prague, Czech Republic

<sup>5</sup> Center for Fundamental and Applied Microbiomics, Arizona State University, AZ, USA

<sup>6</sup> Loop Genomics, San Jose, CA, USA

\*Corresponding author: [tuval@loopgenomics.com](mailto:tuval@loopgenomics.com)

## List of Tables

**Supplementary Table 1.** Bacterial species in the ATCC-gut and ATCC-oral mock community samples.

**Supplementary Table 2.** Mapping Zymo-Loop and Zymo-V3V4 to references provided by Zymo Research.

**Supplementary Table 1.** Bacterial species in the ATCC-gut and ATCC-oral mock community samples.

| Species                                         | Strain       | System | Genome Size (Mb) | 16S rRNA gene copies | Expected proportion (%) |
|-------------------------------------------------|--------------|--------|------------------|----------------------|-------------------------|
| <i>Bacteroides fragilis</i>                     | ATCC 25285   | Gut    | 5.2              | 6                    | 8.0                     |
| <i>Bacteroides vulgatus</i>                     | ATCC 8482    | Gut    | 5.2              | 7                    | 9.3                     |
| <i>Clostridioides difficile</i>                 | ATCC 9689    | Gut    | 4.3              | 12                   | 16.0                    |
| <i>Enterobacter cloacae</i>                     | ATCC 13047   | Gut    | 5.6              | 8                    | 10.7                    |
| <i>Escherichia coli</i>                         | ATCC 700926  | Gut    | 4.6              | 7                    | 9.3                     |
| <i>Salmonella enterica subsp. enterica</i>      | ATCC 9150    | Gut    | 2.7              | 7                    | 9.3                     |
| <i>Bifidobacterium adolescentis</i>             | ATCC 15703   | Gut    | 2.0              | 5                    | 6.7                     |
| <i>Enterococcus faecalis</i>                    | ATCC 700802  | Gut    | 3.2              | 4                    | 5.3                     |
| <i>Lactobacillus plantarum</i>                  | ATCC BAA-793 | Gut    | 3.3              | 5                    | 6.7                     |
| <i>Helicobacter pylori</i>                      | ATCC 700392  | Gut    | 1.7              | 2                    | 2.7                     |
| <i>Yersinia enterocolitica</i>                  | ATCC 27729   | Gut    | 4.6              | 7                    | 9.3                     |
| <i>Fusobacterium nucleatum subsp. nucleatum</i> | ATCC 25586   | Gut    | 2.2              | 5                    | 6.7                     |
| <i>Schaalia odontolytica</i>                    | ATCC 17982   | Oral   | 2.4              | 3                    | 11.5                    |
| <i>Prevotella melaninogenica</i>                | ATCC 25845   | Oral   | 1.8              | 4                    | 15.4                    |
| <i>Fusobacterium nucleatum subsp. nucleatum</i> | ATCC 25586   | Oral   | 2.2              | 5                    | 19.2                    |
| <i>Streptococcus mitis</i>                      | ATCC 49456   | Oral   | 1.9              | 4                    | 15.4                    |
| <i>Veillonella parvula</i>                      | ATCC 17745   | Oral   | 2.2              | 4                    | 15.4                    |
| <i>Haemophilus parainfluenzae</i>               | ATCC 33392   | Oral   | 2.1              | 6                    | 23.1                    |

**Supplementary Table 2.** Mapping Zymo-Loop and Zymo-V3V4 to references provided by Zymo Research.

| <b>Species</b>                 | <b>Genome size (Mb)</b> | <b>GC content (%)</b> | <b>16S rRNA gene copies</b> | <b>Gram stain</b> | <b>Expected proportion (%)</b> | <b>Zymo-Loop 16S (%)</b> | <b>Zymo-V3V4 (%)</b> |
|--------------------------------|-------------------------|-----------------------|-----------------------------|-------------------|--------------------------------|--------------------------|----------------------|
| <i>Bacillus subtilis</i>       | 4.0                     | 43.9                  | 10                          | +                 | 17.4                           | 21.0                     | 15.6                 |
| <i>Enterococcus faecalis</i>   | 2.8                     | 37.5                  | 4                           | +                 | 9.9                            | 9.7                      | 9.0                  |
| <i>Escherichia coli</i>        | 4.9                     | 46.7                  | 7                           | -                 | 10.1                           | 10.9                     | 11.9                 |
| <i>Lactobacillus fermentum</i> | 1.9                     | 52.4                  | 5                           | +                 | 18.4                           | 11.3                     | 15.7                 |
| <i>Listeria monocytogenes</i>  | 3.0                     | 38.0                  | 6                           | +                 | 14.1                           | 17.4                     | 12.6                 |
| <i>Pseudomonas aeruginosa</i>  | 6.8                     | 66.2                  | 4                           | -                 | 4.2                            | 4.2                      | 8.0                  |
| <i>Salmonella enterica</i>     | 4.8                     | 52.2                  | 7                           | -                 | 10.4                           | 11.2                     | 12.0                 |
| <i>Staphylococcus aureus</i>   | 2.7                     | 32.9                  | 6                           | +                 | 15.5                           | 14.3                     | 15.2                 |
